# Supplementary material for: Perfluoroalkyl Acid Concentrations in Blood Samples Subjected to Transportation and Processing Delay
Source: PLoS One. 2015 Sep 10;10(9):e0137768. doi: 10.1371/journal.pone.0137768 (PMC4565678; doi:10.1371/journal.pone.0137768)
Supplement: S1 Dataset — (XLSX) [file pone.0137768.s001.xlsx]

## Sheet: Ark1
S1 Dataset. Concentrations of perfluoroalkyl acids in 88 plasma samples from pregnant Danish women, 2005.
Sample number	PFHxS	PFHpS	PFOS	PFDS	PFOSA	PFHpA	PFOA	PFNA	PFDA	PFUnA	PFDoA	PFTrA
	ng/mL	ng/mL	ng/mL	ng/mL	ng/mL	ng/mL	ng/mL	ng/mL	ng/mL	ng/mL	ng/mL	ng/mL
	Immediately processed samples
1	0.588	0.445	27.4	0.0912	0.827	0.0962	2.79	0.771	0.431	1.76	2.21	0.183
2	0.386	0.331	34.3	0.0485	1.84	0.0109	2.11	0.556	0.377	0.858	0.769	0.0126
3	0.508	0.24	8.35	0.0468	0.371	0.0463	2.31	0.393	0.197	0.233	0.702	0.0377
4	0.319	0.224	13.4	0.0478	0.26	0.0693	1.48	0.503	0.521	0.691	0.548	0.0362
5	0.247	0.158	11.1	0.0496	0.368	0.0944	1.79	0.463	0.253	0.389	0.249	0
6	0.449	0.383	29.6	0.242	0.922	0.0108	4.19	0.788	0.519	0.767	0.513	0.0324
7	0.597	0.346	22.1	0.0712	0.483	0.0896	2.75	0.774	0.592	1.13	0.784	0.0297
8	0.788	0.287	15.9	0.147	0.465	0.00658	2.49	0.715	0.398	1.2	0.631	0.0737
9	0.313	0.199	14.1	0.0584	0.43	0.287	2.57	0.994	0.486	1.19	0.734	0.0685
10	0.494	0.234	15.2	0.0594	0.289	0.0352	1.83	0.794	0.412	0.971	0.646	0.0229
11	0.774	0.465	27	0.0689	0.801	0.0523	3.78	1.04	0.509	1.03	0.471	0.0514
12	0.674	0.358	31.8	0.108	0.893	0.244	5.4	2.15	1.73	2.67	1.99	0.114
13	0.578	0.326	24.8	0.0837	0.21	0.0786	3.63	1.04	0.682	0.969	0.531	0.0054
14	0.453	0.262	19.4	0.0639	0.93	0.0307	2.74	2.02	0.729	2.32	0.876	0.0843
15	0.76	0.386	23.7	0.0581	0.771	0.0423	2.15	0.787	0.404	1	0.594	0.0471
16	0.769	0.312	27.3	0.593	0.584	0.33	4.34	1.11	0.635	1.54	0.673	0.14
17	0.729	0.31	19.6	0.0702	0.289	0.0204	2.36	0.781	0.54	1.47	0.875	0.0891
18	0.563	0.316	26.1	0.124	0.806	0.0851	1.91	0.764	0.491	1.1	0.744	0.0811
19	0.658	0.288	17.6	0.0672	1.13	0.0186	1.81	0.743	0.479	1.16	0.576	0.0307
20	0.358	0.232	14.3	0.0499	0.792	0.0938	4.95	1.31	1.37	1.16	1.3	0.0637
21	0.69	0.425	27	0.0475	0.398	0.0986	3.96	0.662	0.368	0.581	0.249	0.00908
22	0.738	0.225	13.7	0.625	0.437	0.0145	1.78	0.349	0.183	0.518	0.358	0.025
23	0.509	0.266	19.2	0.0671	0.518	0.102	2.89	0.977	0.548	1.06	0.664	0.0527
24	0.36	0.22	16.4	0.06	0.24	0.01	2.23	0.68	0.44	0.57	0.47	0.01
25	1.47	0.226	11.6	0.0533	0.838	0.113	1.98	0.578	0.423	1.23	0.853	0.115
26	0.902	0.456	30.6	0.105	1.32	1.95	9.66	4.52	1.68	1.88	1.22	0.0917
27	0.619	0.308	18	0.0463	0.251	0.131	6.71	1.79	1.37	0.593	0.77	0
28	0.38	0.168	14.4	0.0991	0.384	0.0129	1.35	0.732	0.493	1.27	0.82	0.043
29	0.533	0.266	17.9	0.0483	0.486	0.0502	2.04	0.803	0.576	1.22	0.564	0.0583
30	1.36	0.701	34.4	0.148	0.627	0.0525	5.54	1.22	0.797	1.27	0.661	0.115
31	0.596	0.349	21.8	0.0424	1.07	0.595	3.24	1.13	0.613	1.18	0.82	0.118
32	0.913	0.351	25.4	0.0755	0.766	0.163	3.8	1.44	0.733	1.3	0.664	0.106
33	0.588	0.288	20.3	0.0614	1.12	0.237	1.76	0.882	0.48	0.887	0.526	0.0372
34	0.263	0.223	14.2	0.0674	0.469	0.203	1.88	0.953	0.434	0.813	0.396	0.0476
35	0.517	0.242	20.3	0.114	1.35	0.0333	2.4	0.712	0.408	0.887	0.505	0.0375
36	0.763	0.464	23.1	0.0818	0.497	0.055	3.6	0.628	0.384	0.907	0.499	0.075
37	0.648	0.289	22.3	0.0878	0.706	0.0523	2.15	0.933	0.585	1.58	1.01	0.1
38	0.4395	0.272	20.55	0.0538	1.265	0.1105	3.825	0.577	0.43	0.9025	0.5475	0.06365
39	0.471	0.192	18	0.11415	0.4615	0.2305	2.895	0.8115	0.49	0.915	0.451	0.10905
40	0.7625	0.3575	32.25	0.12355	0.3385	0.02695	3.77	0.919	0.47	1.165	0.4715	0.143
41	0.467	0.135	6.11	0.0601	0.0321	0.0404	1.82	0.454	0.175	0.183	0.0582	0.109
42	0.566	0.266	17.3	0.0703	0.0417	0.0266	2.49	0.668	0.22	0.153	0.0322	0.0377
43	0.455	0.164	8.09	0.0619	0.0341	0	1.99	0.484	0.165	0.0738	0.028	0
44	0.41	0.155	8.75	0.0636	0.124	0.252	1.86	0.833	0.261	0.105	0.0369	0
45	0.416	0.137	12.8	0.101	0.0856	0.0195	1.71	0.562	0.228	0.134	0.0314	0.0861
46	0.595	0.348	15.5	0.134	0.139	0.0873	3.67	0.479	0.161	0.157	0.037	0.0607
47	0.502	0.187	10.9	0.0645	0.0904	0.117	2.31	0.656	0.243	0.143	0.0433	0.0682
48	0.547	0.131	10.9	0.0874	0.042	0.118	2.52	0.566	0.214	0.18	0.0374	0.0172
49	0.59	0.215	11.5	0.0667	0.0482	0.0773	2.4	0.579	0.19	0.106	0.0198	0
50	0.316	0.239	25.5	0.103	0.113	0.0775	3.78	1.11	0.28	0.168	0.0278	0.0522
51	0.36	0.154	9.29	0.372	0.0634	0.0195	1.8	0.415	0.142	0.125	0.0275	0.0208
52	0.443	0.137	6.82	0.0408	0.0279	0.0645	1.72	0.631	0.214	0.113	0.0199	0
53	0.6	0.252	13.7	0.0927	0.072	0.162	2.29	0.769	0.305	0.223	0.0462	0.0555
54	0.8605	0.1385	13.25	0.155	0.111	0.09625	1.45	0.7075	0.274	0.3415	0.08055	0.345
55	0.419	0.192	14.35	0.08615	0.0758	0.0517	2.845	1.275	0.366	0.255	0.0622	0.0743
56	0.8415	0.3335	26.65	0.112	0.0951	0.06455	3.37	0.99	0.2875	0.1995	0.04495	0.07065
57	0.8185	0.397	19.95	0.1022	0.225	0.106	3.42	1.275	0.2675	0.1935	0.03855	0.1162
58	0.4515	0.212	15.6	0.10215	0.116	0.3005	3.555	0.891	0.355	0.264	0.0833	0.11445
59	0.383	0.0522	6.47	0.186	0.0981	0.138	1.73	0.527	0.186	0.266	0.148	0.291
60	0.542	0.22	18.3	0.0972	0.308	0.0365	1.83	0.677	0.288	0.481	0.177	0.203
61	0.734	0.377	29.3	0.0822	0.131	0.587	6	2.43	0.633	0.487	0.231	0.137
62	0.562	0.235	20.5	0.0976	0.168	0.279	3.81	1.19	0.371	0.355	0.167	0.104
63	0.372	0.183	10.1	0.0918	0.116	0.0163	2.5	0.481	0.218	0.213	0.0883	0.0521
64	0.289	0.0842	7.89	0.063	0.0747	0.053	0.926	0.388	0.156	0.154	0.0756	0.0675
65	0.718	0.209	15.3	0.186	0.118	0.0418	3.53	0.715	0.25	0.378	0.216	0.187
66	0.256	0.092	7.28	0.0559	0.0735	0.0715	1.98	0.793	0.205	0.218	0.138	0.0861
67	0.304	0.0732	6.2	0.0583	0.257	0.038	0.889	0.547	0.245	0.422	0.17	0.224
68	1.2	0.52	35.4	0.122	0.55	1.41	10.8	3.71	1.04	0.615	0.397	0.179
69	0.339	0.139	11.3	0.0726	0.44	0.00639	2.12	0.463	0.175	0.147	0.0931	0.0808
70	0.229	0.119	10.7	0.0975	0.0809	0.0407	1.08	0.621	0.298	0.381	0.198	0.187
71	0.0505	0.0273	2.3	0.0529	0.0932	0.0211	0.357	0.401	0.16	0.224	0.103	0.0647
72	1.43	0.502	29.8	0.108	0.146	0.158	4.92	1.23	0.376	0.326	0.149	0.177
73	0.633	0.251	21.1	0.134	0.46	0.123	2.61	1.11	0.673	1.64	0.889	0.621
74	0.353	0.13	13.2	0.0774	0.323	0.0631	1.22	0.4	0.226	0.504	0.424	0.21
75	0.742	0.436	32	0.0853	0.21	0.17	3.27	0.736	0.349	0.483	0.401	0.142
76	0.574	0.218	15	0.097	0.322	0.0139	1.81	0.797	0.388	0.534	0.215	0.156
77	0.433	0.153	9.58	0.0834	0.252	0.0446	1.99	0.724	0.39	0.401	0.155	0.185
78	0.409	0.218	14.1	0.0843	0.28	0.0185	1.81	0.974	0.434	0.56	0.298	0.203
79	0.738	0.311	22.2	0.41	0.262	0.15	3.03	1.14	0.558	0.855	0.394	0.346
80	0.631	0.209	11.7	1.47	0.216	0.0084	1.85	0.404	0.236	0.525	0.251	0.166
81	2.01	0.266	15.5	0.0895	0.115	0.0908	3.2	0.526	0.278	0.231	0.231	0.116
82	0.838	0.401	29.8	0.172	0.229	0.0727	8.82	1.04	0.468	0.544	0.307	0.188
83	0.524	0.194	11	0.0783	0.278	0.173	2.43	0.696	0.323	0.333	0.171	0.124
84	1.02	0.481	24.7	0.0708	0.716	0.0868	4.56	1.07	0.359	0.341	0.167	0.0807
85	0.605	0.298	20.7	0.107	0.206	0.0357	3.14	1	0.422	0.648	2.72	0.28
86	0.754	0.293	18.4	0.0874	0.0942	0.13	2.93	0.849	0.424	0.466	0.233	0.205
87	0.607	0.19	11.6	0.0889	0.251	0.123	2.38	0.813	0.346	0.48	0.312	0.269
88	0.829	0.289	16	0.1475	0.107	0.10165	3.15	0.8295	0.347	0.581	0.2165	0.32
	Transported and delayed samples
1	0.52	0.22	16.7	0.114	0.0389	0.0969	2.58	0.635	0.208	0.238	0.0439	0.137
2	0.336	0.208	21.2	0.0919	0.169	0.00577	1.96	0.494	0.197	0.135	0.0236	0.0863
3	0.48	0.18	5.52	0.0777	0.011	0.0475	2.28	0.37	0.116	0.04	0.00909	0.0344
4	0.377	0.16	9.78	0.0797	0	0.0798	1.46	0.473	0.182	0.146	0.0387	0.0786
5	0.237	0.11	8.4	0.0833	0.0121	0.103	1.81	0.458	0.16	0.0917	0.0203	0.0635
6	0.514	0.326	23.4	0.188	0.132	0.0126	4.26	0.733	0.356	0.217	0.052	0.0992
7	0.574	0.21	15.7	0.0996	0.0323	0.0901	2.75	0.719	0.379	0.225	0.0495	0.1
8	0.792	0.215	11.8	0.129	0.0416	0.00395	2.42	0.657	0.232	0.249	0.0419	0.111
9	0.291	0.145	10.1	0.0923	0.0207	0.304	2.61	0.918	0.3	0.245	0.0443	0.124
10	0.448	0.182	11.2	0.0915	0.00203	0.0323	1.79	0.703	0.244	0.205	0.0361	0.0808
11	0.806	0.362	20.7	0.107	0.0812	0.064	3.86	1.01	0.324	0.246	0.0407	0.12
12	0.649	0.278	24.2	0.131	0.0944	0.261	5.45	2	1.14	0.556	0.139	0.141
13	0.629	0.261	19.6	0.0932	0.00379	0.0768	3.91	1.03	0.436	0.262	0.0482	0.0599
14	0.434	0.179	13.7	0.101	0.0991	0.0421	2.66	1.85	0.438	0.524	0.0743	0.146
15	0.779	0.299	17.7	0.126	0.0731	0.0464	2.21	0.73	0.259	0.202	0.0373	0.133
16	0.758	0.305	21.7	0.331	0.0649	0.349	4.24	1.03	0.375	0.385	0.0611	0.146
18	0.538	0.226	20.1	0.128	0.0869	0.0846	1.89	0.724	0.3	0.247	0.0567	0.149
19	0.734	0.0685	11.4	0.253	0.131	0.0328	1.77	0.711	0.292	0.22	0.0393	0.139
20	0.379	0.172	10.7	0.0917	0.079	0.0941	4.8	1.18	0.835	0.244	0.0888	0.125
21	0.669	0.295	20.2	0.096	0.0334	0.102	3.84	0.621	0.215	0.163	0.0285	0.0905
22	0.705	0.201	11.3	0.503	0.0525	0.0118	1.86	0.368	0.124	0.134	0.0323	0.0903
23	0.508	0.192	14.4	0.103	0.0484	0.112	2.94	0.918	0.36	0.254	0.044	0.107
24	0.52	0.11	12.1	0.33	0.06	0.08	2.36	0.72	0.3	0.18	0.07	0.17
25	1.34	0.0859	6.93	0.202	0.0998	0.191	2.04	0.536	0.306	0.295	0.0955	0.223
26	0.834	0.173	21.2	0.244	0.242	2.61	9.6	3.98	1.09	0.495	0.154	0.159
27	0.739	0.115	11.8	0	0.0236	0.165	6.53	1.55	0.789	0.175	0.082	0.0928
28	0.651	0.0915	9.46	0.2	0.0334	0.118	1.48	0.741	0.323	0.373	0.114	0.13
29	0.598	0.0928	12.4	0.174	0.0583	0.0706	2.15	0.729	0.311	0.32	0.066	0.14
30	1.8	0.276	24.3	0.292	0.0783	0.0887	5.59	1.18	0.519	0.34	0.0772	0.222
31	0.561	0.141	14.5	0.156	0.148	0.709	3.27	1.07	0.333	0.277	0.0751	0.234
32	1.18	0.177	18.3	0.334	0.147	0.796	4.16	1.59	0.551	0.422	0.112	0.23
33	0.979	0.193	14.3	0.235	0.203	0.412	1.94	0.962	0.365	0.306	0.0738	0.127
34	0.456	0.0769	9.85	0.207	0.0186	0.316	2.03	0.923	0.245	0.154	0.033	0.159
35	1.39	0.138	13.8	0.247	0.181	0.102	2.55	0.669	0.281	0.206	0.0561	0.157
36	1.31	0.286	16.2	0.206	0.0486	0.123	3.65	0.622	0.234	0.241	0.0741	0.16
37	2.04	0.208	17.5	0.207	0.084	0.118	2.23	0.839	0.349	0.425	0.125	0.202
38	1.35	0.185	15.7	0.26	0.204	0.21	3.83	0.5805	0.281	0.289	0.0923	0.189
39	1.115	0.2105	14.25	0.2745	0.06085	0.3835	3.08	0.893	0.337	0.2865	0.08645	0.1425
40	1.2	0.233	23.45	0.253	0.0323	0.10005	3.72	0.878	0.3115	0.3185	0.0849	0.185
41	0.463	0.136	6.23	0.0713	0.0564	0.0305	1.85	0.456	0.166	0.185	0.0338	0.123
42	0.67	0.28	19.4	0.0801	0.0621	0.0477	2.51	0.697	0.255	0.184	0.0403	0.201
43	0.484	0.217	9.44	0.0649	0.0595	0.0471	2.19	0.552	0.195	0.0788	0.0275	0.0137
44	0.425	0.175	9.63	0.0801	0.172	0.281	1.94	0.835	0.303	0.124	0.0402	0.0239
45	0.416	0.214	14.1	0.0713	0.117	0.0247	1.76	0.614	0.223	0.148	0.0348	0.0617
46	0.464	0.185	10.9	0.0708	0.103	0.121	2.38	0.701	0.246	0.173	0.0408	0.0803
47	0.579	0.338	15.5	0.136	0.138	0.0872	3.82	0.494	0.145	0.163	0.0332	0.0476
48	0.561	0.174	11.4	0.0826	0.0502	0.124	2.77	0.633	0.242	0.171	0.0367	0.0778
49	0.599	0.223	12.6	0.0738	0.0758	0.087	2.5	0.643	0.224	0.112	0.0286	0.0166
50	0.333	0.2	25.2	0.142	0.15	0.106	3.88	1.06	0.314	0.177	0.0377	0.179
51	0.415	0.162	9.87	0.426	0.0827	0.0241	1.86	0.449	0.155	0.131	0.0252	0.0547
52	0.443	0.146	7.03	0.0562	0.0282	0.0688	1.79	0.652	0.222	0.122	0.0167	0.00788
53	0.573	0.302	14	0.0895	0.0863	0.176	2.09	0.758	0.316	0.209	0.0416	0.0774
54	0.9175	0.253	15.1	0.1097	0.137	0.093	1.5	0.7395	0.287	0.377	0.078	0.2535
55	0.491	0.2315	15.4	0.08115	0.09255	0.06195	3.11	1.335	0.4015	0.2715	0.05685	0.135
56	0.934	0.499	30.2	0.08665	0.123	0.0712	3.625	1.025	0.2975	0.1935	0.04235	0.03965
57	0.798	0.532	19.7	0.0591	0.271	0.108	3.32	1.27	0.262	0.191	0.0393	0.105
58	0.471	0.217	15.4	0.116	0.129	0.307	3.53	0.897	0.334	0.245	0.0675	0.227
59	0.38	0.0802	6.72	0.0822	0.0702	0.127	1.88	0.557	0.201	0.249	0.105	0.105
60	0.605	0.2	18.5	0.107	0.36	0.0514	1.96	0.724	0.331	0.508	0.177	0.298
61	0.769	0.305	29.4	0.166	0.133	0.645	6.12	2.49	0.655	0.527	0.244	0.232
62	0.57	0.249	19.8	0.111	0.221	0.244	3.74	1.15	0.362	0.349	0.202	0.116
63	0.372	0.177	9.89	0.0729	0.139	0.0155	2.58	0.516	0.233	0.194	0.0932	0.0439
64	0.294	0.0854	8.08	0.0633	0.106	0.0604	0.995	0.391	0.158	0.154	0.101	0.0814
65	0.715	0.219	15.7	0.172	0.12	0.0461	3.6	0.755	0.266	0.402	0.183	0.166
66	0.265	0.109	7.98	0.0573	0.0909	0.0764	2.03	0.833	0.236	0.216	0.145	0.114
67	0.296	0.0715	6.25	0.0715	0.252	0.0435	0.873	0.557	0.247	0.431	0.191	0.19
68	1.17	0.48	36.3	0.21	0.52	1.82	11.65	3.79	1.15	0.66	0.36	0.25
69	0.3	0.147	11.6	0.0907	0.431	0.0148	2.14	0.473	0.167	0.123	0.0721	0.091
70	0.244	0.133	11.3	0.0833	0.0681	0.0431	1.15	0.615	0.32	0.417	0.185	0.241
71	0.076	0.0341	2.36	0.0671	0.0956	0.0241	0.34	0.405	0.146	0.221	0.0881	0.0716
72	1.48	0.541	29.8	0.118	0.176	0.16	5.09	1.27	0.396	0.329	0.123	0.302
73	0.565	0.292	21.8	0.134	0.598	0.121	2.51	1.09	0.703	1.6	1.56	0.626
74	0.304	0.152	12.8	0.0623	0.324	0.0618	1.21	0.379	0.221	0.467	0.402	0.189
75	0.734	0.419	30.6	0.1	0.152	0.177	3.23	0.672	0.337	0.452	0.367	0.136
76	0.602	0.268	17.5	0.0855	0.433	0.0144	1.88	0.819	0.456	0.685	0.515	0.197
77	0.671	0.101	10.1	0.111	0.237	0.0583	1.99	0.732	0.383	0.445	0.199	0.224
78	0.401	0.213	13.7	0.0869	0.182	0.0245	1.83	0.993	0.409	0.492	0.21	0.18
79	0.786	0.356	24.3	0.397	0.312	0.165	3.3	1.17	0.584	0.931	0.464	0.252
80	0.66	0.203	12.1	1.53	0.265	0.00722	2.02	0.448	0.253	0.506	0.253	0.185
81	2.03	0.295	17	0.0563	0.118	0.0949	3.4	0.573	0.293	0.254	0.25	0.107
82	0.797	0.432	30.1	0.173	0.192	0.0748	9.08	1.04	0.445	0.498	0.292	0.196
83	0.506	0.205	11.3	0.0603	0.259	0.18	2.48	0.715	0.333	0.375	0.187	0.123
84	1.15	0.486	27.1	0.0969	0.721	0.1	4.81	1.09	0.367	0.317	0.186	0.122
85	0.649	0.338	21.3	0.0907	0.192	0.0362	3.18	0.991	0.43	0.604	0.276	0.245
86	0.852	0.325	19.1	0.0707	0.0876	0.143	3.01	0.855	0.376	0.563	0.224	0.162
87	0.601	0.176	11.4	0.0924	0.22	0.13	2.53	0.855	0.336	0.491	0.214	0.261
88	0.8535	0.3725	17.05	0.09895	0.118	0.1105	3.435	0.837	0.342	0.6325	0.2635	0.2305
	Delayed samples (no transport)
68	1.25	0.67	39.85	0.16	0.56	1.78	12.15	4.14	1.13	0.7	0.41	0.16
69	0.32	0.152	11.4	0.0886	0.414	0.00722	2.04	0.472	0.167	0.132	0.0734	0.0648
70	0.23	0.128	10.9	0.0879	0.0773	0.0328	1.13	0.621	0.297	0.403	0.183	0.251
71	0.07	0.0292	2.4	0.0525	0.0895	0.0228	0.357	0.403	0.164	0.223	0.09	0.101
72	1.48	0.637	31.4	0.122	0.18	0.152	5.12	1.27	0.421	0.346	0.145	0.22
73	0.578	0.272	22	0.0925	0.572	0.121	2.52	1.09	0.677	1.76	1.34	0.351
74	0.335	0.159	13	0.0736	0.31	0.0601	1.21	0.38	0.196	0.506	0.37	0.163
75	0.751	0.49	32.2	0.0914	0.179	0.183	3.31	0.751	0.35	0.454	0.319	0.202
76	0.611	0.183	15.4	0.135	0.288	0.0131	1.79	0.775	0.365	0.512	0.153	0.209
77	0.494	0.121	9.49	0.0831	0.238	0.0411	1.95	0.702	0.386	0.373	0.146	0.148
78	0.489	0.188	13.9	0.0914	0.247	0.0221	1.9	1.01	0.41	0.53	0.286	0.198
79	0.796	0.337	22.3	0.322	0.224	0.157	3.22	1.14	0.47	0.831	0.387	0.285
80	0.643	0.234	11.4	1.6	0.261	0.00776	1.89	0.431	0.286	0.512	0.322	0.229
81	1.92	0.292	16.1	0.0646	0.0957	0.0919	3.21	0.546	0.296	0.226	0.176	0.09
82	0.757	0.369	28.2	0.177	0.196	0.0716	8.64	0.97	0.425	0.444	0.225	0.166
83	0.519	0.193	10.3	0.095	0.24	0.168	2.19	0.666	0.272	0.312	0.186	0.107
84	1.14	0.517	27.9	0.0843	0.754	0.104	5.05	1.13	0.347	0.337	0.184	0.105
85	0.57	0.338	20.6	0.13	0.19	0.0391	3.08	0.951	0.391	0.571	0.242	0.289
86	0.724	0.262	17.1	0.0766	0.101	0.126	2.89	0.852	0.37	0.494	0.258	0.176
87	0.589	0.193	12.3	0.0751	0.249	0.125	2.55	0.91	0.353	0.513	0.222	0.233
88	0.84	0.28	16.4	0.1	0.11	0.1	3.42	0.83	0.35	0.61	0.27	0.21
